# Supplementary material for: Hydrothermal liquefaction for biochar production from finger millet waste: its valorisation, process optimization, and characterization
Source: Royal Society of Chemistry journal article supplement (doi:10.1039/d4ra03945a), 2024-01-01
Supplement: d4ra03945a1.pdf [file d4ra03945a1.pdf]

## Supplementary Material

### Hydrothermal Liquefaction for Biochar Production from Finger Millet Waste: Its Valorisation, Process Optimization, and Characterization

Ayush Kandari<sup>1</sup>, Sushant Kotiyal<sup>1</sup>, Afzal Hussain<sup>2</sup>, Vinod Kumar<sup>1,6</sup>, Shuchi Upadhyay<sup>4</sup>,  
Waseem Ahmad<sup>3</sup>, Ajay Singh<sup>7</sup>, Sanjay Kumar<sup>1\*</sup>

<sup>1</sup>Department of Food Science and Technology, Graphic Era (Deemed to be University), Dehradun, Uttarakhand, 248002, India

<sup>2</sup>Department of Pharmacognosy, College of Pharmacy, King Saud University, PO Box 2457, Riyadh 11451, Saudi Arabia

<sup>3</sup>Department of Chemistry, Graphic Era (Deemed to be University), Dehradun, Uttarakhand, 248002, India

<sup>4</sup>Department of Allied Health Sciences, School of Health Sciences and Technology, UPES Dehradun, Uttarakhand, 248007, India

<sup>5</sup> Division of Research and Innovation, Uttaranchal University, Dehradun 248007, India

<sup>6</sup>Peoples' Friendship, University of Russia, (RUDN University), Moscow 117198, Russian Federation

Corresponding email id: [mr.sanju4u@gmail.com](mailto:mr.sanju4u@gmail.com)

**Fig S1:** Normal probability curve (a) biochar yield, (b) bulk density, (c) pH, and (d) HHV

**Fig S2:** Externally studentized residual plots (a) biochar yield, (b) bulk density, (c) pH, and (d) HHV.

**Fig. S3** 3D response surface and contour plot showing effect of (a) temperature and time. (b) temperature and solid-to-water ratio and (c) time and solid-to-water ratio on biochar yield.

**Fig. S4** 3D response surface and contour plot showing effect of (a) temperature and time (b) temperature and solid-to-water ratio and (c) time and solid-to-water ratio on bulk density.

**Fig. S5** 3D response surface and contour plot showing effect of (a) temperature and time (b) temperature and solid-to-water ratio and (c) time and solid-to-water ratio on pH.

**Fig. S6** 3D response surface and contour plot showing effect of (a) temperature and time (b) temperature and solid-to-water ratio and (c) time and solid-to-water ratio on HHV.

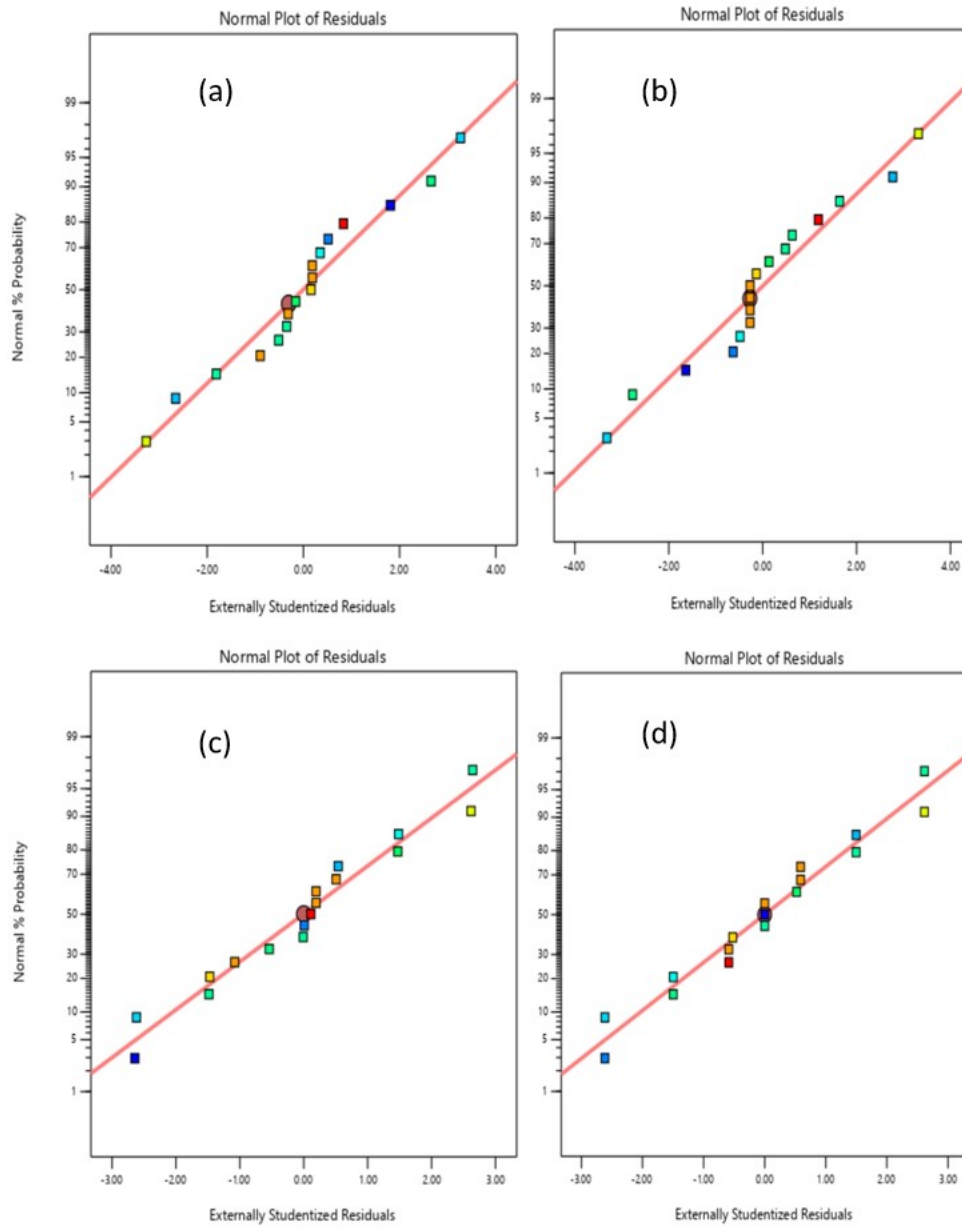

**Fig. S1** Normal probability curve (a) biochar yield, (b) bulk density, (c) pH, and (d) HHV

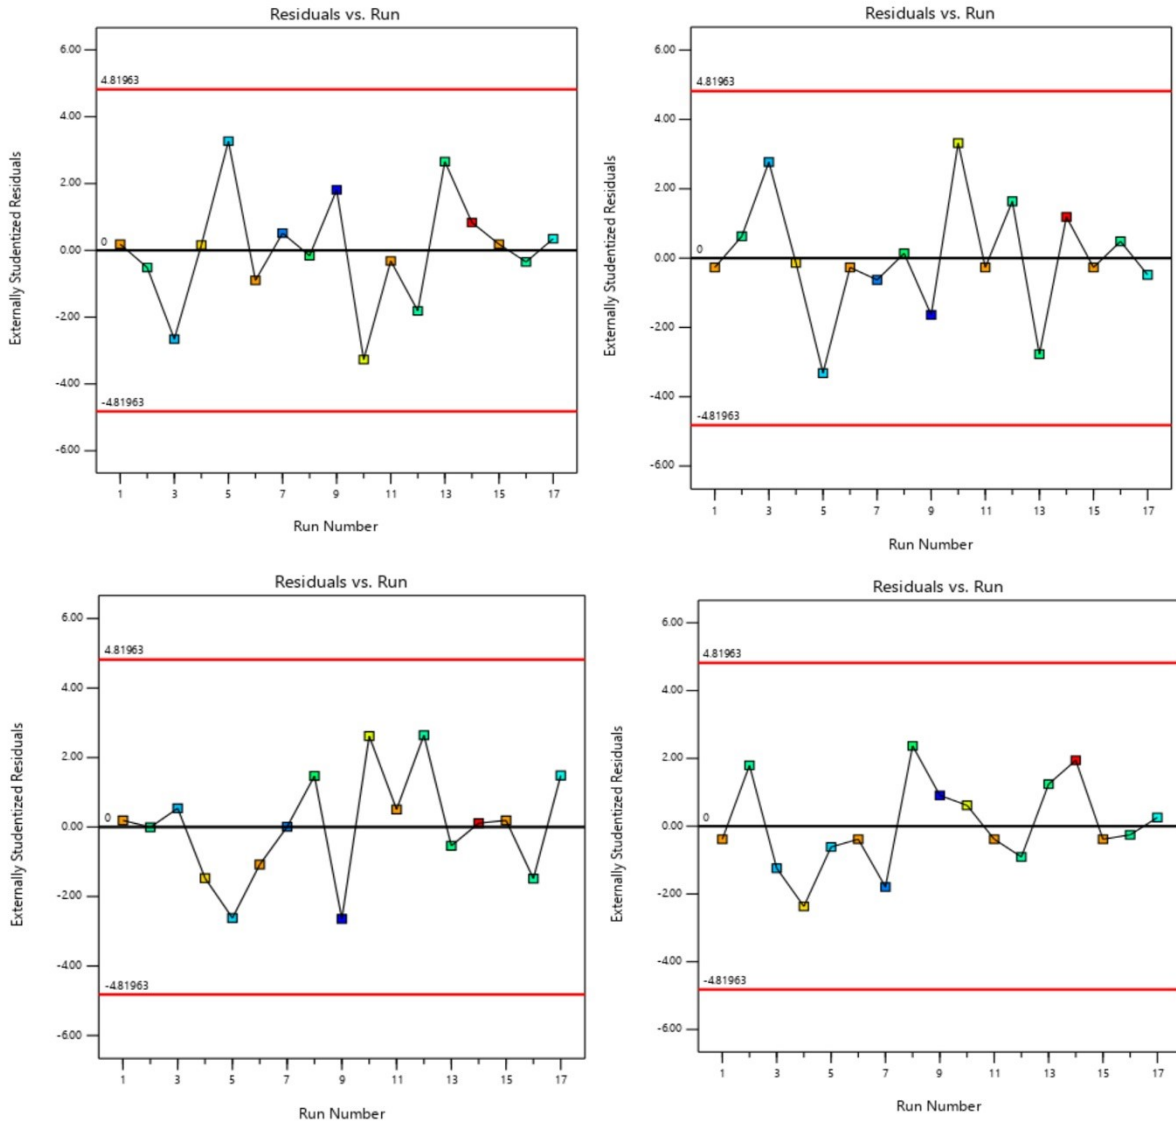

**Fig. S2** Externally studentized residual plots (a) biochar yield, (b) bulk density, (c) pH, and (d) HHV.

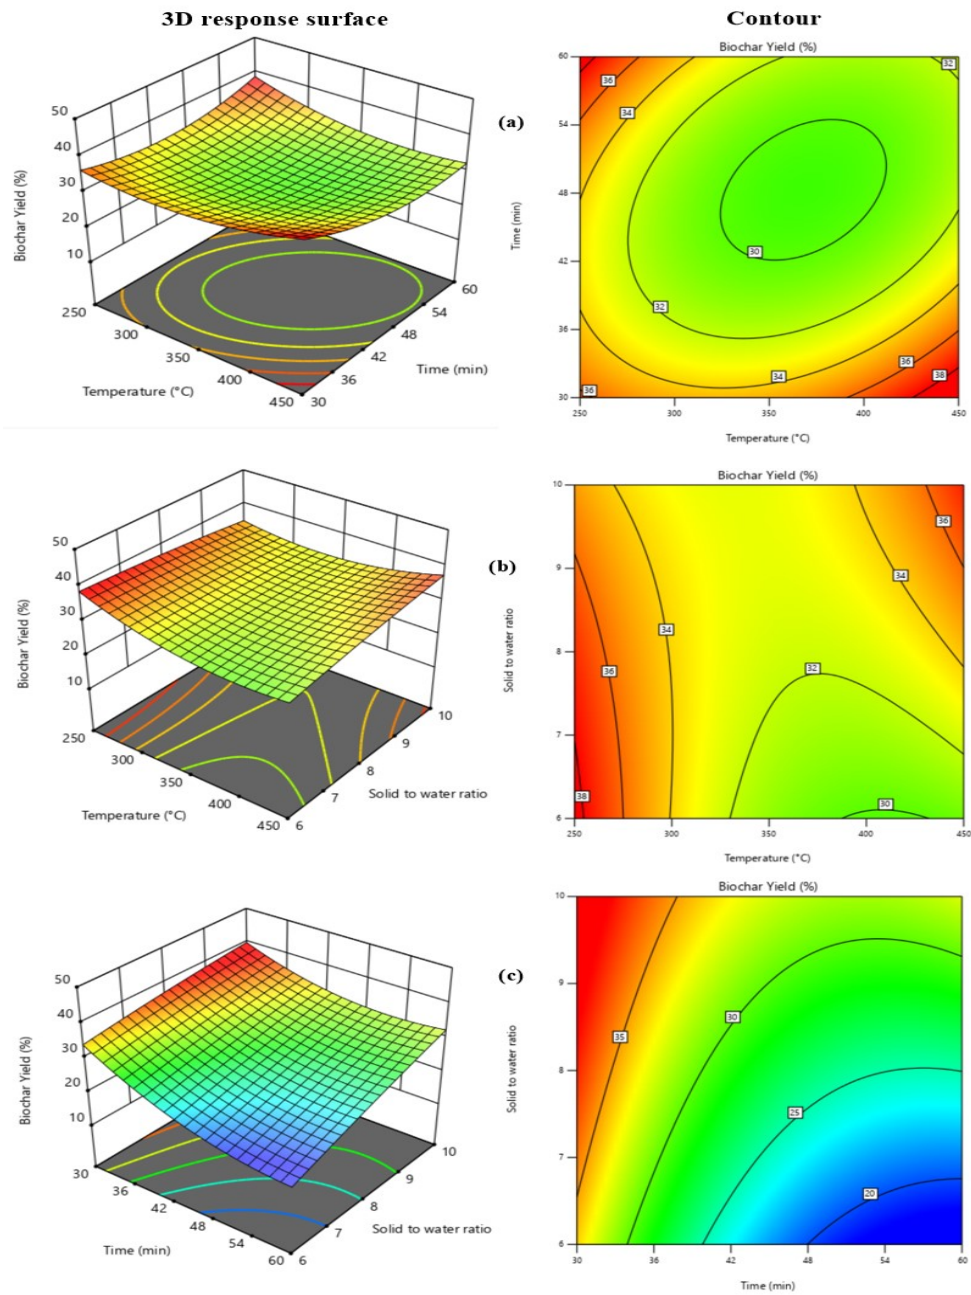

**Fig. S3** 3D response surface and contour plot showing effect of (a) temperature and time (b) temperature and solid-to-water ratio and (c) time and solid-to-water ratio on biochar yield.

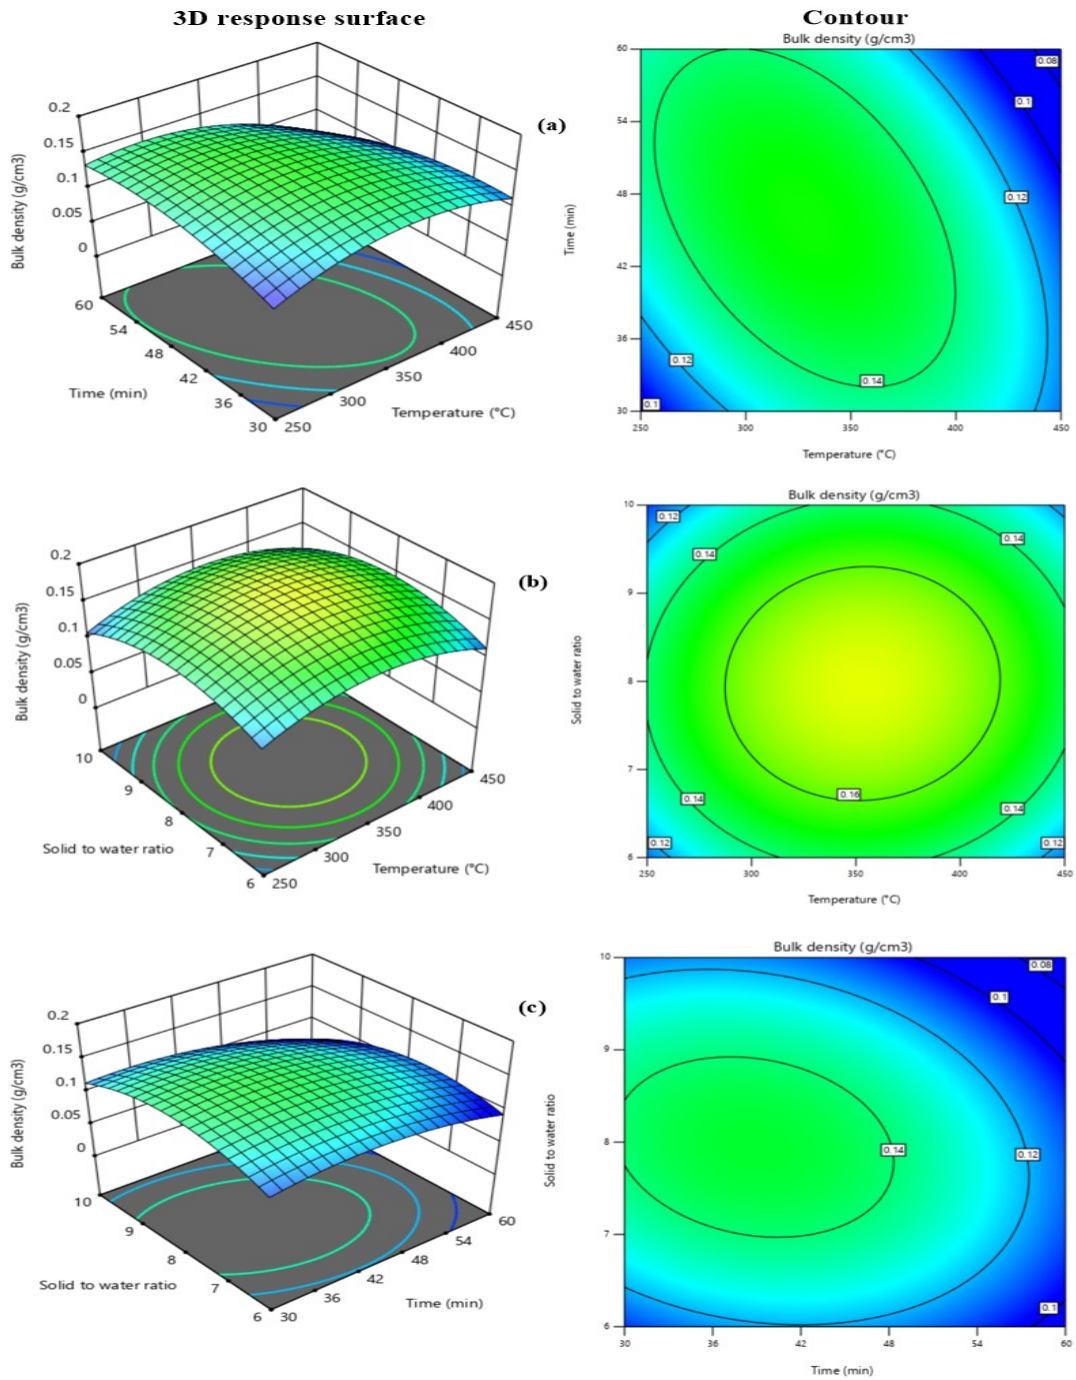

**Fig. S4** 3D response surface and contour plot showing effect of (a) temperature and time (b) temperature and solid-to-water ratio and (c) time and solid-to-water ratio on bulk density.

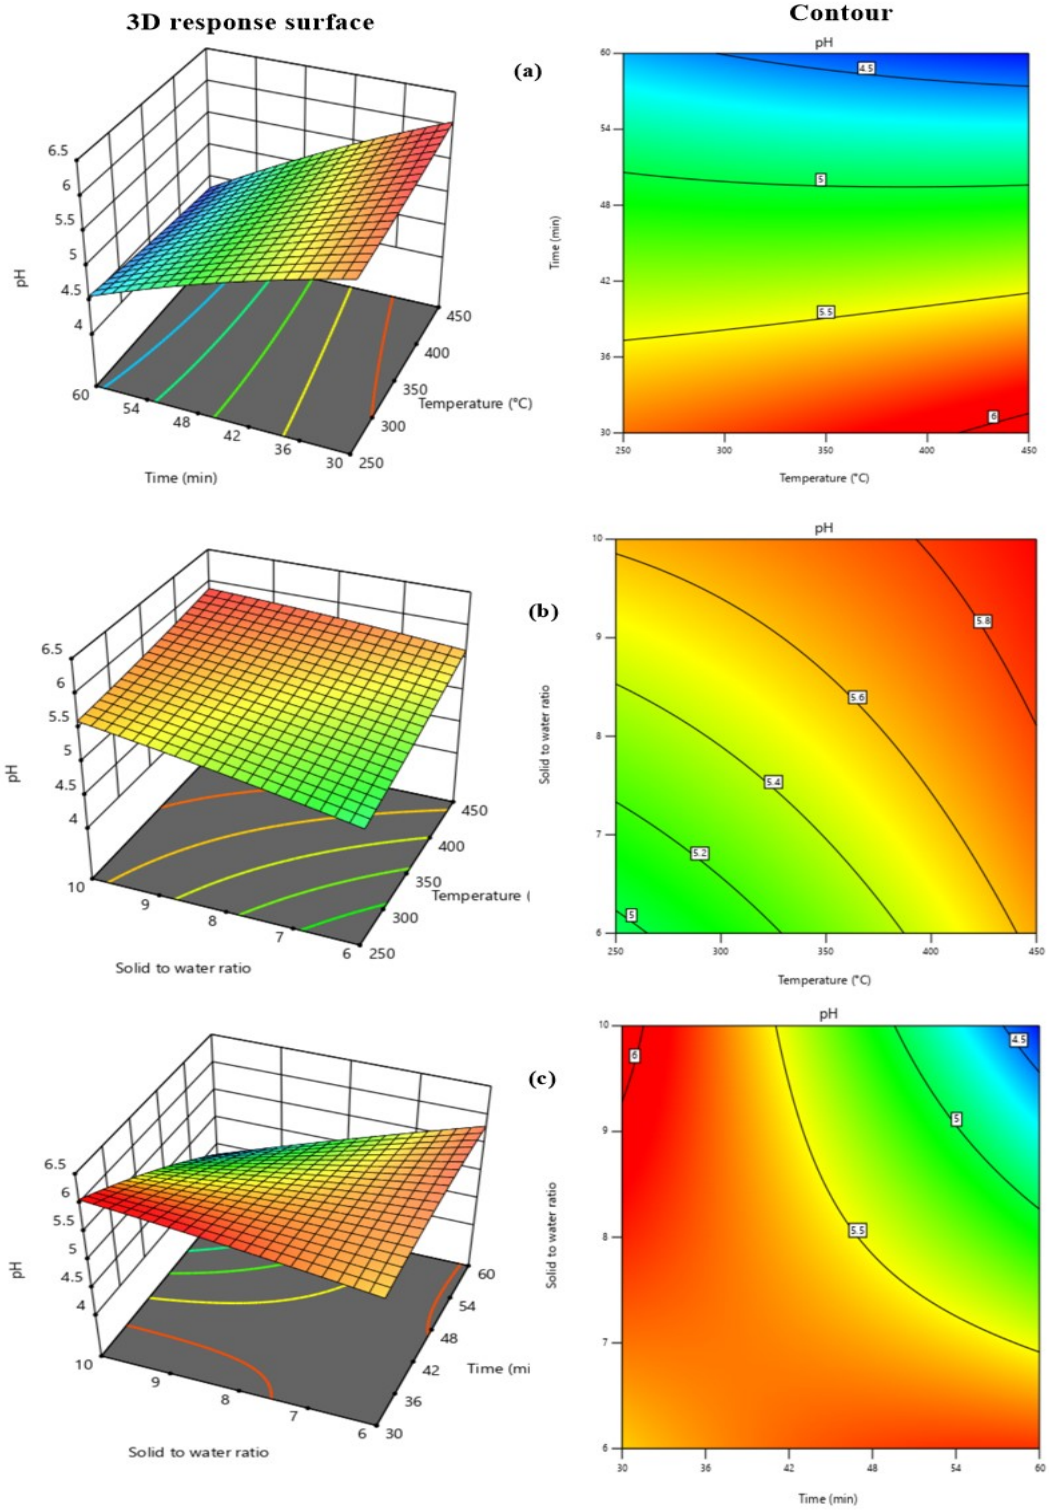

**Fig. S5** 3D response surface and contour plot showing effect of (a) temperature and time (b) temperature and solid-to-water ratio and (c) time and solid-to-water ratio on pH.

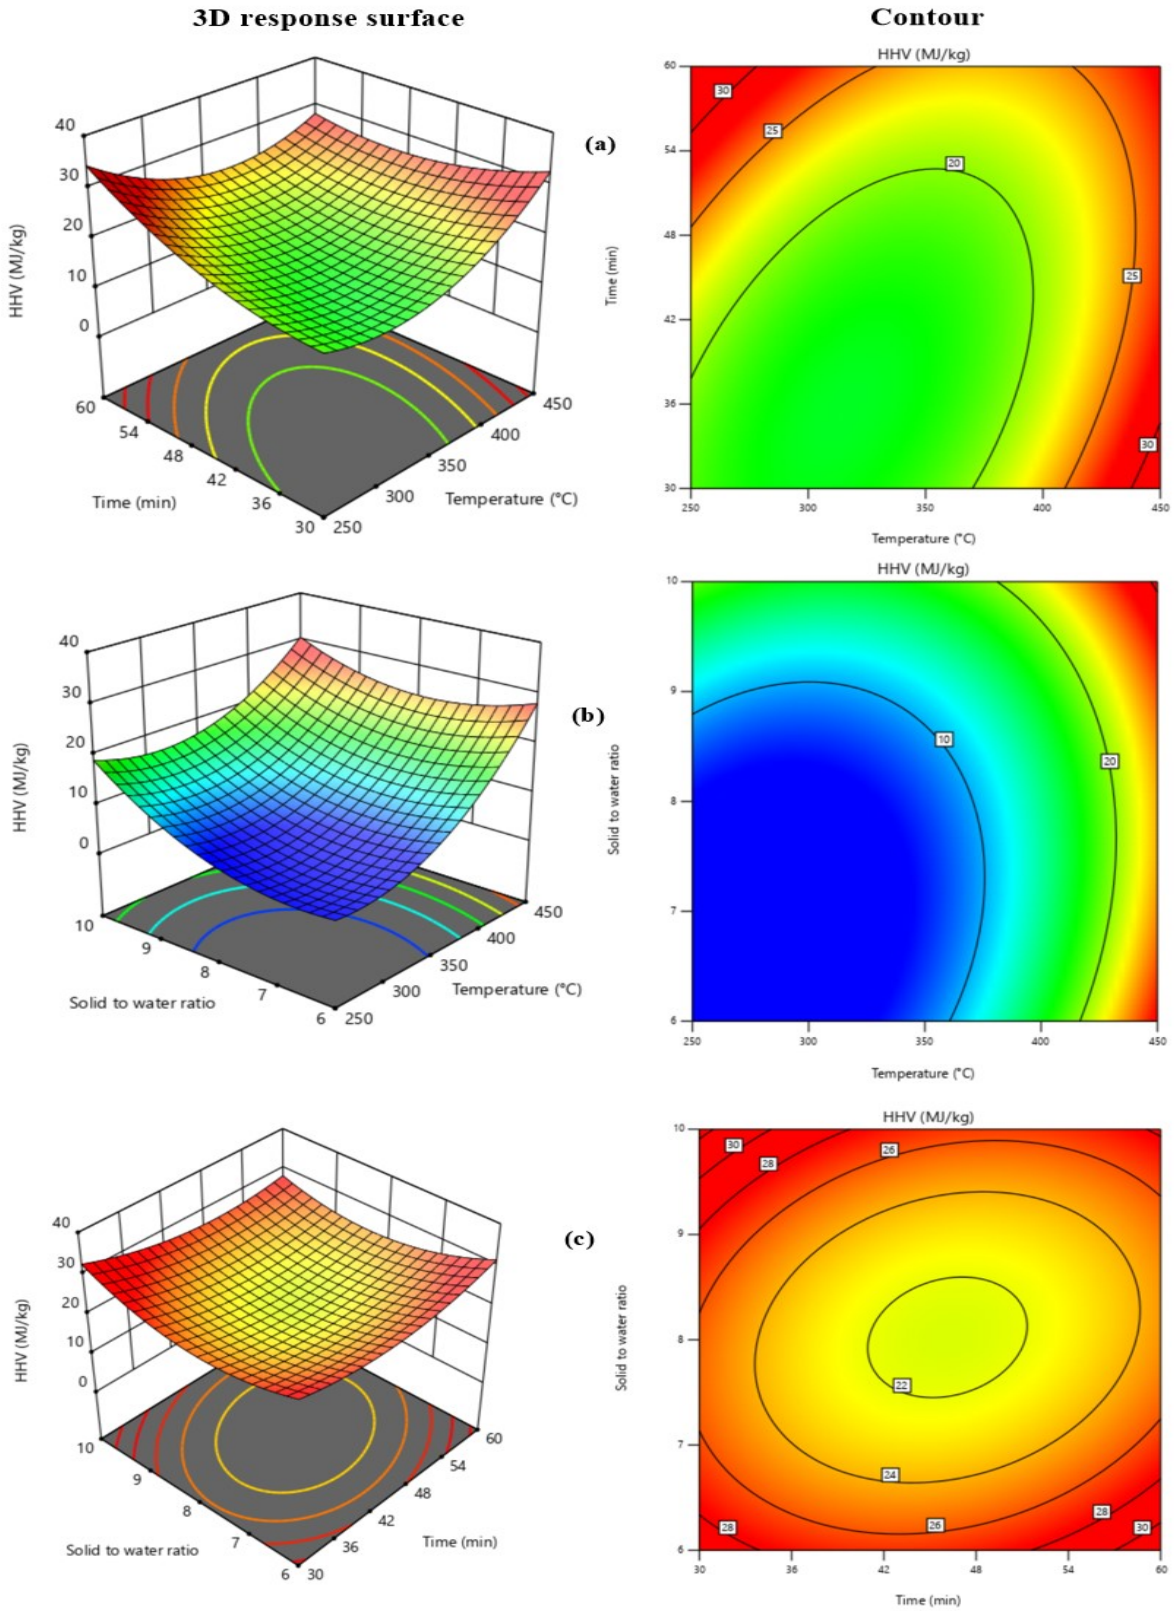

**Fig. S6** 3D response surface and contour plot showing effect of (a) temperature and time (b) temperature and solid-to-water ratio and (c) time and solid-to-water ratio on HHV.
